# Supplementary material for: The effect of dietary carbohydrate and calorie restriction on weight and metabolic health in overweight/obese individuals: a multi-center randomized controlled trial
Source: Springer Nature journal article supplement (doi:10.1186/s12916-023-02869-9), 2023-05-24
Supplement: MOESM2 [file 25400130]

## Supplementary Appendix

| <b>Supplemental Tables and Figures</b>                                                                                   | <b>Pages</b> | <b>page</b> |
|--------------------------------------------------------------------------------------------------------------------------|--------------|-------------|
| Fig. S1. Adherence to the prescribed diets over 12 weeks                                                                 |              | 1           |
| Fig. S2. Metabolites changes of LC diet and CR diet at baseline and 12 weeks                                             |              | 2           |
| Table S1. Food profile of diet interventions                                                                             |              | 3           |
| Table S2. Baseline characteristics of study participants included in completer analysis                                  |              | 4           |
| Table S3. Daily physical activity (steps/day) at baseline and during follow-up                                           |              | 6           |
| Table S4. Energy and nutrition intake during follow-up of completer participants                                         |              | 7           |
| Table S5. Adherence during the 12-week intervention                                                                      |              | 9           |
| Table S6. Effects of dietary intake on weight loss and body fat after 12-week intervention of completer participants     |              | 10          |
| Table S7. Effects of dietary intake on cardiovascular risk factors during 12-week intervention of completer participants |              | 11          |
| Table S8. Tests of between subject-effect                                                                                |              | 13          |

Fig. S1

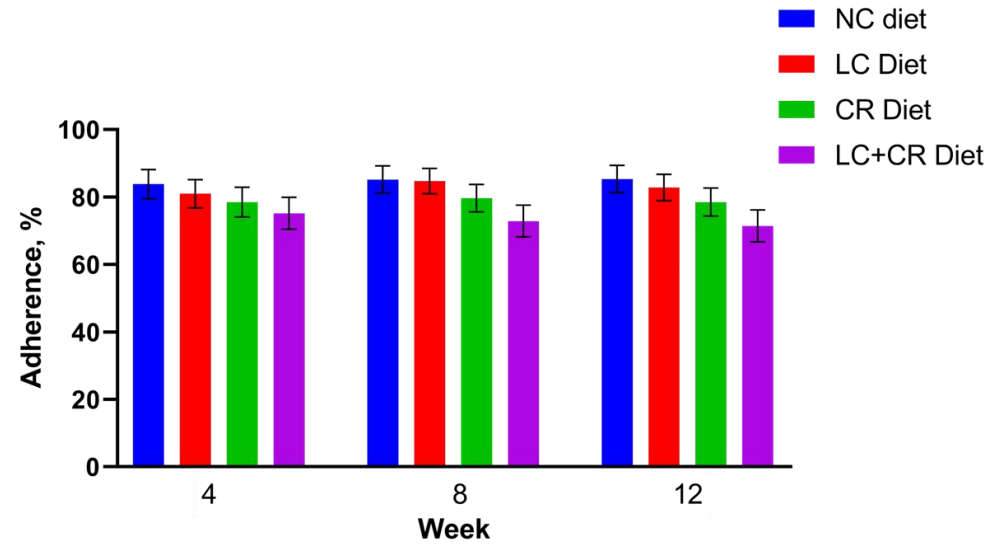

No. of Participants

|            |    |    |    |
|------------|----|----|----|
| NC Diet    | 65 | 63 | 62 |
| LC Diet    | 71 | 67 | 67 |
| CR Diet    | 67 | 64 | 63 |
| LC+CR Diet | 69 | 69 | 69 |

Adherence to the prescribed diets over 12 weeks. Data presented are observed data for the full analysis set from the in-trial period. Error bars represent standard error for the mean. Participant numbers shown denote those contributing to the mean.

Fig. S2

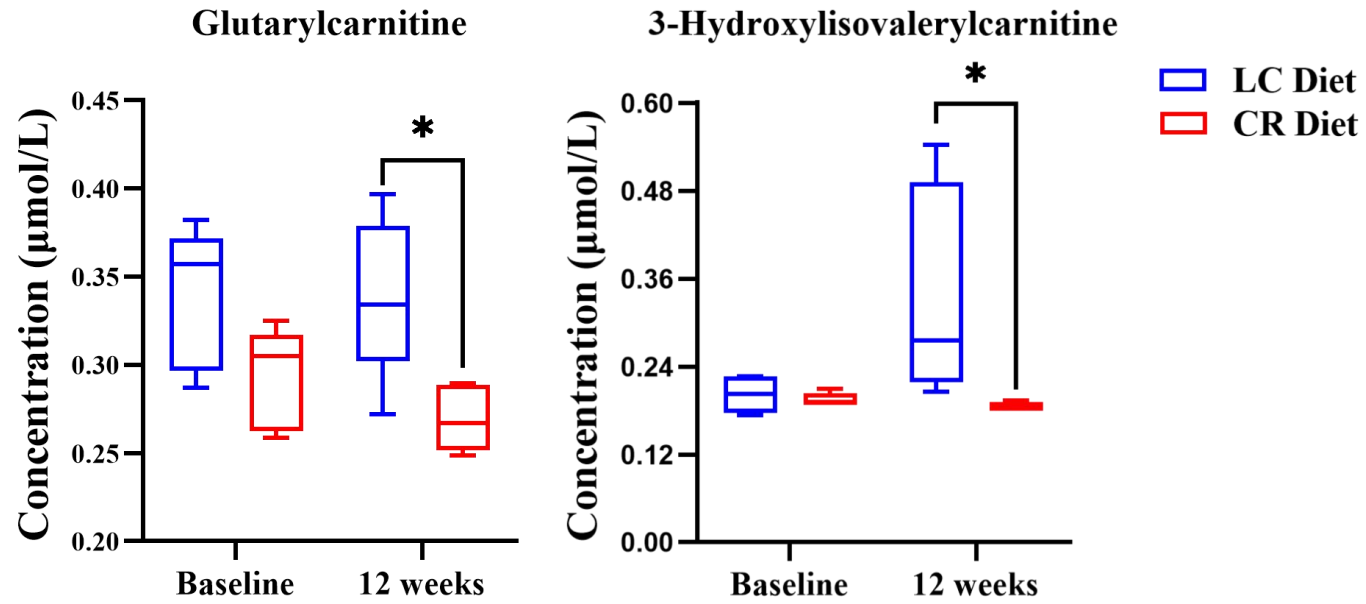

Metabolites changes of LC diet and CR diet at baseline and 12 weeks. \*denotes the significant differences of metabolites between LC diet and CR diet.

**Table S1. Food profile of diet interventions**

| <b>NC diet, 1700-1800kcal</b>                                                                                                                                                       | <b>LC diet, 1700-1800kcal</b>                                                                                                                                                   | <b>CR diet, 1200-1300kcal</b>                                                                                                                                                         | <b>LC+CR diet, 1200-1300kcal</b>                                                                                                                                                     |
|-------------------------------------------------------------------------------------------------------------------------------------------------------------------------------------|---------------------------------------------------------------------------------------------------------------------------------------------------------------------------------|---------------------------------------------------------------------------------------------------------------------------------------------------------------------------------------|--------------------------------------------------------------------------------------------------------------------------------------------------------------------------------------|
| <ul style="list-style-type: none"> <li>• Staple 800kcal<br/>(e.g., rice 700g or noodles 250g or pancakes 310g or potatoes/corn 920g)</li> </ul>                                     | <ul style="list-style-type: none"> <li>• 2 nutritional bar* 370kcal</li> </ul>                                                                                                  | <ul style="list-style-type: none"> <li>• Staple 520kcal<br/>(e.g. rice 450g or noodles 162.5g or pancakes 201.5g or potatoes/corn 598g);</li> </ul>                                   | <ul style="list-style-type: none"> <li>• 2 nutritional bar* 370kcal</li> </ul>                                                                                                       |
| <ul style="list-style-type: none"> <li>• Vegetables 300~500g;</li> <li>• Fruits 90kcal<br/>(e.g., 1 apple/mango)</li> </ul>                                                         | <ul style="list-style-type: none"> <li>• Low starch vegetables 400~500g;</li> <li>• Low GI# fruits 180kcal<br/>(e.g., 2 apples/orange/peach or 20 grapes)</li> </ul>            | <ul style="list-style-type: none"> <li>• Vegetables 300~500g;</li> <li>• Fruits 90kcal<br/>(e.g., 1 apple/ 1 mango)</li> </ul>                                                        | <ul style="list-style-type: none"> <li>• Low starch vegetables 400~500g;</li> <li>• Low GI# fruits 90kcal<br/>(e.g., 1apples/orange/peach or 10 grapes)</li> </ul>                   |
| <ul style="list-style-type: none"> <li>• Meat 350kcal<br/>(e.g., lean pork/red meat 250g or fish/shrimp 350g);</li> <li>• 1 egg;</li> <li>• 200ml milk or 400ml soy milk</li> </ul> | <ul style="list-style-type: none"> <li>• Meat 430kcal<br/>(e.g., pork/red meat 300g or fish/shrimp 430g);</li> <li>• 2 eggs;</li> <li>• 250ml milk or 500ml soy milk</li> </ul> | <ul style="list-style-type: none"> <li>• Meat 215kcal<br/>(e.g., lean pork/red meat 150g or fish/ shrimp 215g);</li> <li>• 1 egg;</li> <li>• 200ml milk or 400ml soy milk;</li> </ul> | <ul style="list-style-type: none"> <li>• Meat 300kcal<br/>(e.g., lean pork/red meat 200g or fish/shrimp 300g) ;</li> <li>• 1 egg;</li> <li>• 200ml milk or 400ml soy milk</li> </ul> |
| <ul style="list-style-type: none"> <li>• Nut 55kcal<br/>(e.g., walnuts / apricot kernel 10g)</li> </ul>                                                                             | <ul style="list-style-type: none"> <li>• Nut 110kcal<br/>(e.g., walnuts / apricot kernel 20g)</li> </ul>                                                                        | <ul style="list-style-type: none"> <li>• Nut 55kcal<br/>(e.g., walnuts / apricot kernel 10g)</li> </ul>                                                                               | <ul style="list-style-type: none"> <li>• Nut 55kcal<br/>(e.g., walnuts / apricot kernel 10g)</li> </ul>                                                                              |
| <ul style="list-style-type: none"> <li>• Cooking oil 180kcal<br/>(e.g., peanut oil / canola oil / soybean oil 20g)</li> </ul>                                                       | <ul style="list-style-type: none"> <li>• Cooking oil 270kcal<br/>(e.g., peanut oil / canola oil / soybean oil 30g)</li> </ul>                                                   | <ul style="list-style-type: none"> <li>• Cooking oil 135kcal<br/>(e.g., peanut oil / canola oil / soybean oil 15g)</li> </ul>                                                         | <ul style="list-style-type: none"> <li>• Cooking oil 180kcal<br/>(e.g., peanut oil / canola oil / soybean oil 20g)</li> </ul>                                                        |

\* 45g each nutritional bar providing energy of 185 kcal, including 32.2g protein, 15.7g fat and 29.2g carbohydrate. Main components: whey protein, soy protein isolate, chia seed, oligosaccharide, collagen, konjac extract,  $\gamma$ -aminobutyric acid.

#GI, glycemic index

**Table S2. Baseline characteristics of study participants included in completer analysis**

| <b>Characteristic</b>              | <b>NC diet (n =62)</b> | <b>LC Diet (n = 67)</b> | <b>CR Diet (n = 63)</b> | <b>LC+CR Diet (n = 69)</b> |
|------------------------------------|------------------------|-------------------------|-------------------------|----------------------------|
| Female, No. (%)                    | 40(64.5)               | 50(74.6)                | 45(71.4)                | 50(72.5)                   |
| Age, y                             | 35.2 (8.5)             | 34.6 (7.9)              | 33.4 (6.1)              | 33.4 (6.8)                 |
| High school education, No. (%)     | 11(17.7)               | 22(34.3)                | 16(25.4)                | 12(17.4)                   |
| Current cigarette smoking, No. (%) | 10(16.1)               | 12(17.9)                | 15(23.8)                | 11(16.0)                   |
| Current alcohol drinking, No. (%)  | 20(32.3)               | 12(17.9)                | 29(46.0)                | 11(16.0)                   |
| Total energy intake, kcal/d        | 1806.7 (186.9)         | 1923.3 (336.8)          | 1825.0 (250.0)          | 1921.7 (433.1)             |
| Carbohydrate intake, %             | 50.0 (6.7)             | 48.7 (5.3)              | 50.3 (3.8)              | 54.2 (7.6)                 |
| Protein intake, %                  | 21.0 (4.6)             | 22.0 (3.0)              | 19.0 (3.4)              | 18.2 (4.6)                 |
| Fat intake, %                      | 29.0 (3.2)             | 29.3 (6.7)              | 30.8 (2.9)              | 27.7 (3.7)                 |
| Weight, kg                         | 78.7 (12.7)            | 78.7 (13.0)             | 78.7 (12.1)             | 83.3 (19.3)                |
| BMI, kg/m <sup>2</sup>             | 29.6 (3.5)             | 30.0 (3.6)              | 30.0 (3.3)              | 31.0 (4.8)                 |
| Waist circumference, cm            | 93.7 (9.4)             | 93.3 (9.6)              | 94.3 (9.0)              | 95.2 (13.7)                |
| WHR                                | 0.89 (0.6)             | 0.89 (0.6)              | 0.89 (0.6)              | 0.89 (0.7)                 |
| Heart rate, beats /min             | 76.7 (8.2)             | 78.2 (8.6)              | 77.9 (11.7)             | 77.0 (8.8)                 |
| Blood pressure, mm Hg              |                        |                         |                         |                            |
| Systolic                           | 119.0 (12.8)           | 114.8 (10.1)            | 114.4 (10.7)            | 115.0 (12.1)               |
| Diastolic                          | 75.2 (17.2)            | 76.6 (9.5)              | 78.7 (7.4)              | 78.1 (7.6)                 |
| Plasma glucose, mg/dL              | 94.1 (9.3)             | 91.1 (9.7)              | 94.2 (9.0)              | 93.9 (8.3)                 |
| HOMA-IR                            | 3.4 (2.5)              | 3.2 (2.3)               | 3.3 (2.9)               | 3.8 (2.5)                  |
| Serum triglycerides, mg/dL         | 195.5 (36.4)           | 189.0 (39.4)            | 197.8 (39.0)            | 192.8 (37.0)               |
| Serum total cholesterol, mg/dL     | 140.2 (75.5)           | 133.1 (85.0)            | 134.9 (100.3)           | 155.0 (122.3)              |
| HDL, mg/dL                         | 46.6 (12.0)            | 48.9 (13.6)             | 47.6 (9.4)              | 45.3 (10.4)                |
| LDL, mg/dL                         | 119.9 (33.1)           | 113.4 (34.6)            | 123.0 (30.8)            | 116.7 (26.6)               |

| <b>Characteristic</b>              | <b>NC diet (n =62)</b> | <b>LC Diet (n = 67)</b> | <b>CR Diet (n = 63)</b> | <b>LC+CR Diet (n = 69)</b> |
|------------------------------------|------------------------|-------------------------|-------------------------|----------------------------|
| ALT, IU/L                          | 28.4 (22.7)            | 24.0 (14.8)             | 27.0 (19.6)             | 28.0 (20.3)                |
| AST, IU/L                          | 22.2 (10.0)            | 19.9 (7.9)              | 20.4 (9.1)              | 20.4 (8.4)                 |
| Uric acid, mg/dl                   | 6.7 (1.4)              | 6.4 (1.6)               | 6.8 (1.7)               | 6.7 (2.0)                  |
| Body fat, %                        | 34.2 (4.5)             | 34.8 (4.9)              | 35.1 (4.3)              | 35.2 (4.0)                 |
| Visceral Fat Area, cm <sup>2</sup> | 108.0 (36.8)           | 95.7(33.2)              | 103.8(29.1)             | 92.5(42.3)                 |
| Body muscle rate, %                | 60.6 (4.3)             | 59.6 (4.5)              | 59.4 (4.1)              | 59.4 (3.8)                 |

**Table S3. Daily physical activity (steps/day) at baseline and during follow-up**

| Time     | NC diet (n = 74) | LC Diet (n = 76) | CR Diet (n = 72) | LC+CR Diet (n = 76) | <i>P</i> Values    |                    |                       |                       |
|----------|------------------|------------------|------------------|---------------------|--------------------|--------------------|-----------------------|-----------------------|
|          |                  |                  |                  |                     | LC diet vs NC diet | LC Diet vs CR Diet | LC+CR Diet vs LC Diet | LC+CR Diet vs CR Diet |
| Baseline | 7614(2100)       | 7392(2406)       | 7107(2488)       | 7248(2702)          | 0.584              | 0.483              | 0.718                 | 0.728                 |
| 4 weeks  | 8010(2672)       | 7356(2310)       | 6875(2436)       | 7170(2139)          | 0.106              | 0.237              | 0.64                  | 0.468                 |
| 8 weeks  | 7205(2534)       | 7412(2531)       | 7285(2832)       | 7759(2499)          | 0.609              | 0.756              | 0.383                 | 0.244                 |
| 12 weeks | 6745(2241)       | 7443(2800)       | 7036(2464)       | 7612(2330)          | 0.084              | 0.318              | 0.671                 | 0.157                 |

Data are means (SD).

**Table S4. Energy and nutrition intake during follow-up of completer participants**

| Characteristic         | Changes (95% CIs)        |                          |                          |                          | P Values           |                       |                    |                       |                    |
|------------------------|--------------------------|--------------------------|--------------------------|--------------------------|--------------------|-----------------------|--------------------|-----------------------|--------------------|
|                        | NC diet (n = 62)         | LC Diet (n = 67)         | CR Diet (n = 63)         | LC+CR Diet (n = 69)      | LC diet vs NC diet | LC+CR Diet vs CR Diet | CR diet vs NC diet | LC+CR Diet vs LC Diet | LC Diet vs CR Diet |
| Energy intake, kcal    |                          |                          |                          |                          |                    |                       |                    |                       |                    |
| Week 4                 | 1660.6(1588.6 to 1732.7) | 1517.8(1453.2 to 1582.3) | 1218.4(1147.9 to 1288.8) | 1271.1(1205.4 to 1336.9) | 0.004              | 0.282                 | <0.001             | <0.001                | <0.001             |
| Week 8                 | 1655.0(1582.6 to 1727.3) | 1507.8(1442.9 to 1572.7) | 1221.8(1151 to 1292.6)   | 1271.8(1205.7 to 1337.9) | 0.003              | 0.310                 | <0.001             | <0.001                | <0.001             |
| Week 12                | 1639.3(1567 to 1711.6)   | 1500.4(1435.6 to 1565.1) | 1220.1(1149.4 to 1290.8) | 1266.5(1200.5 to 1332.5) | 0.005              | 0.345                 | <0.001             | <0.001                | <0.001             |
| Carbohydrate intake, g |                          |                          |                          |                          |                    |                       |                    |                       |                    |
| Week 4                 | 206.4(196.4 to 216.4)    | 62.5(53.5 to 71.5)       | 145.5(135.7 to 155.2)    | 56.0(46.8 to 65.1)       | <0.001             | <0.001                | <0.001             | 0.315                 | <0.001             |
| Week 8                 | 205.0(194.5 to 215.5)    | 62.4(53 to 71.8)         | 146.5(136.3 to 156.8)    | 56.3(46.7 to 65.9)       | <0.001             | <0.001                | <0.001             | 0.374                 | <0.001             |
| Week 12                | 201.8(191.3 to 212.3)    | 63.4(54 to 72.8)         | 145.3(135.0 to 155.6)    | 56.9(47.4 to 66.5)       | <0.001             | <0.001                | <0.001             | 0.343                 | <0.001             |
| Carbohydrate intake, % |                          |                          |                          |                          |                    |                       |                    |                       |                    |
| Week 4                 | 49.4(48.0 to 50.8)       | 16.6(15.3 to 17.8)       | 47.5(46.2 to 48.9)       | 17.6(16.4 to 18.9)       | <0.001             | <0.001                | 0.058              | 0.233                 | <0.001             |
| Week 8                 | 49.2(47.7 to 50.6)       | 16.6(15.3 to 17.9)       | 47.8(46.4 to 49.2)       | 17.7(16.4 to 19.1)       | <0.001             | <0.001                | 0.172              | 0.223                 | <0.001             |
| Week 12                | 48.8(47.3 to 50.3)       | 17.1(15.7 to 18.4)       | 47.4(46 to 48.9)         | 18.0(16.7 to 19.4)       | <0.001             | <0.001                | 0.185              | 0.328                 | <0.001             |
| Protein intake, g      |                          |                          |                          |                          |                    |                       |                    |                       |                    |
| Week 4                 | 37.4(34.6 to 40.2)       | 55.2(52.6 to 57.7)       | 27.5(24.7 to 30.2)       | 47.1(44.5 to 49.6)       | <0.001             | <0.001                | <0.001             | <0.001                | <0.001             |
| Week 8                 | 37.0(34.2 to 39.7)       | 55.3(52.8 to 57.8)       | 28.1(25.4 to 30.8)       | 46.9(44.4 to 49.5)       | <0.001             | <0.001                | <0.001             | <0.001                | <0.001             |
| Week 12                | 36.4(33.6 to 39.1)       | 55.5(53.0 to 57.9)       | 28.1(25.4 to 30.8)       | 46.6(44.1 to 49.1)       | <0.001             | <0.001                | <0.001             | <0.001                | <0.001             |
| Protein intake, %      |                          |                          |                          |                          |                    |                       |                    |                       |                    |
| Week 4                 | 20.2(19.0 to 21.5)       | 32.8(31.6 to 33.9)       | 20.4(19.1 to 21.6)       | 33.2(32.0 to 34.3)       | <0.001             | <0.001                | 0.883              | 0.644                 | <0.001             |
| Week 8                 | 20.1(18.8 to 21.5)       | 33.0(31.8 to 34.2)       | 20.8(19.5 to 22.2)       | 33.1(31.8 to 34.3)       | <0.001             | <0.001                | 0.449              | 0.918                 | <0.001             |
| Week 12                | 19.9(18.5 to 21.4)       | 33.4(32.1 to 34.7)       | 20.9(19.5 to 22.3)       | 33.0(31.7 to 34.3)       | <0.001             | <0.001                | 0.351              | 0.651                 | <0.001             |
| Fat intake, g          |                          |                          |                          |                          |                    |                       |                    |                       |                    |



| Characteristic | Changes (95% CIs)  |                    |                     |                     | P Values           |                       |                    |                       |                    |
|----------------|--------------------|--------------------|---------------------|---------------------|--------------------|-----------------------|--------------------|-----------------------|--------------------|
|                | NC diet (n = 62)   | LC Diet (n = 67)   | CR Diet (n = 63)    | LC+CR Diet (n = 69) | LC diet vs NC diet | LC+CR Diet vs CR Diet | CR diet vs NC diet | LC+CR Diet vs LC Diet | LC Diet vs CR Diet |
| Week 4         | 59.2(55.6 to 62.7) | 84.3(81.1 to 87.5) | 48.5(45.0 to 51.9)  | 67.4(64.2 to 70.7)  | <0.001             | <0.001                | <0.001             | <0.001                | <0.001             |
| Week 8         | 59.2(56.1 to 62.3) | 83.0(80.1 to 85.8) | 48.3(45.2 to 51.3)  | 67.5(64.6 to 70.4)  | <0.001             | <0.001                | <0.001             | <0.001                | <0.001             |
| Week 12        | 58.9(56.0 to 61.8) | 82.9(80.3 to 85.5) | 48.5(45.6 to 51.3)  | 67.0(64.4 to 69.7)  | <0.001             | <0.001                | <0.001             | <0.001                | <0.001             |
| Fat intake, %  |                    |                    |                     |                     |                    |                       |                    |                       |                    |
| Week 4         | 32.3(31.0 to 33.6) | 49.8(48.7 to 51.0) | 36.3(35.0 to 37.5)  | 47.9(46.7 to 49.0)  | <0.001             | <0.001                | <0.001             | 0.019                 | <0.001             |
| Week 8         | 32.5(31.3 to 33.7) | 49.5(48.4 to 50.5) | 36.0.(34.8 to 37.2) | 47.8(46.8 to 48.9)  | <0.001             | <0.001                | <0.001             | 0.037                 | <0.001             |
| Week 12        | 32.8(31.5 to 34.0) | 49.9(48.8 to 51.0) | 36.2(35.0 to 37.4)  | 47.7(46.6 to 48.8)  | <0.001             | <0.001                | <0.001             | 0.007                 | <0.001             |

**Table S5. Adherence during the 12-week intervention**

| Characteristic | NC diet   | LC Diet   | CR Diet   | LC+CR Diet | P value            |                    |                    |                       |                       |          |
|----------------|-----------|-----------|-----------|------------|--------------------|--------------------|--------------------|-----------------------|-----------------------|----------|
|                |           |           |           |            | LC diet vs NC Diet | CR Diet vs NC Diet | LC Diet vs CR Diet | LC+CR Diet vs LC Diet | LC+CR Diet vs CR Diet | 4 groups |
| Week 4         | 83.8±34.9 | 81±35.4   | 78.5±35.9 | 75.2±39.5  | 0.648              | 0.399              | 0.688              | 0.348                 | 0.598                 | 0.562    |
| Week 8         | 85.2±32.1 | 84.7±30.7 | 79.6±32.6 | 72.9±39    | 0.935              | 0.355              | 0.391              | 0.042                 | 0.250                 | 0.124    |
| Week 12        | 85.3±31.7 | 82.8±31.8 | 78.5±33   | 71.5±39.4  | 0.677              | 0.263              | 0.469              | 0.054                 | 0.240                 | 0.100    |

Data are presented as the mean ± SD unless otherwise indicated.

**Table S6. Effects of dietary intake on weight loss and body fat after 12-week intervention of completer participants**

| Outcomes                | Changes (95% CIs)    |                      |                      |                       | P Values           |                    |                       |                       | Group differences |
|-------------------------|----------------------|----------------------|----------------------|-----------------------|--------------------|--------------------|-----------------------|-----------------------|-------------------|
|                         | NC diet (n =62)      | LC Diet (n = 67)     | CR Diet (n =63)      | LC+CR Diet (n = 69)   | LC diet vs NC diet | LC Diet vs CR Diet | LC+CR Diet vs LC Diet | LC+CR Diet vs CR Diet |                   |
| BMI, kg/m <sup>2</sup>  | -0.6(-1.9 to 0.7)    | -2.4(-3.6 to -1.1)   | -1.2(-2.5 to 0.1)    | -3.0(-4.2 to -1.7)    | <0.001             | <0.001             | 0.001                 | <0.001                | <0.001            |
| Weight, kg              | -1.5(-6.5 to 3.4)    | -6.1(-10.8 to -1.3)  | -3.1(-8.0 to 1.8)    | -8.1(-12.8 to -3.4)   | <0.001             | <0.001             | <0.001                | <0.001                | <0.001            |
| Waist circumference, cm | -1.7(-5.2 to 1.9)    | -5.7(-9.2 to -2.3)   | -3.2(-6.8 to 0.3)    | -7.1(-10.5 to -3.7)   | <0.001             | <0.001             | 0.012                 | <0.001                | <0.001            |
| WHR ratio               | -0.01(-0.03 to 0.01) | -0.03(-0.05 to 0.00) | -0.02(-0.04 to 0.00) | -0.03(-0.05 to -0.01) | <0.001             | 0.192              | 0.237                 | 0.014                 | <0.001            |
| Body fat, %             | -0.7(-2.3 to 0.9)    | -2.5(-4.0 to -0.9)   | -1.5(-3.1 to -0.1)   | -3.1(-4.7 to -1.6)    | <0.001             | 0.007              | 0.064                 | <0.001                | <0.001            |

**Table S7. Effects of dietary intake on cardiovascular risk factors during 12-week intervention of completer participants**

| Outcome                        | Between-group differences from baseline to week 12 |         |                      |         |                       |         | P Value of Group differences |
|--------------------------------|----------------------------------------------------|---------|----------------------|---------|-----------------------|---------|------------------------------|
|                                | LC diet vs NC diet                                 |         | CR diet vs NC diet   |         | LC+CR diet vs NC diet |         |                              |
|                                | Changes (95% CIs)                                  | P Value | Changes (95% CIs)    | P Value | Changes (95% CIs)     | P Value |                              |
| Plasma glucose, mg/dL          |                                                    |         |                      |         |                       |         |                              |
| Week 4                         | -3.1(-6.5 to 0.3)                                  | 0.937   | -2.4(-5.8 to 1.0)    | 0.092   | -4.0 (-7.4 to -0.6)   | 0.009   | 0.020                        |
| Week 8                         | -3.5(-6.9 to -0.1)                                 | 0.742   | -1.8(-5.2 to 1.7)    | 0.216   | -3.4(-6.8 to 0.0)     | 0.031   | 0.122                        |
| Week 12                        | -3.6(-7.0 to -0.2)                                 | 0.735   | -2.0 (-5.5 to 1.4)   | 0.224   | -1.5(-4.9 to 1.8)     | 0.424   | 0.634                        |
| HOMA-IR                        |                                                    |         |                      |         |                       |         |                              |
| Week 4                         | -1(-1.6 to -0.3)                                   | 0.051   | -0.7(-1.4 to -0.1)   | 0.115   | -1.2(-1.8 to -0.5)    | <0.001  | 0.001                        |
| Week 8                         | -0.7(-1.4 to -0.1)                                 | 0.188   | 0.1(-0.6 to 0.7)     | 0.648   | -0.8(-1.5 to -0.2)    | 0.003   | 0.003                        |
| Week 12                        | -0.6(-1.3 to 0.0)                                  | 0.249   | -0.1(-0.7 to 0.6)    | 0.899   | -0.5(-1.1 to 0.2)     | 0.018   | 0.041                        |
| Serum triglycerides, mg/dL     |                                                    |         |                      |         |                       |         |                              |
| Week 4                         | 1.2(-32.5 to 34.9)                                 | 0.623   | 7.4(-26.8 to 41.6)   | 0.459   | -35.8(-69.3 to -2.4)  | 0.003   | <0.001                       |
| Week 8                         | -25.4(-59.1 to 8.2)                                | 0.168   | -14.1(-48.3 to 20.1) | 0.514   | -44.3(-77.8 to -10.9) | 0.009   | 0.020                        |
| Week 12                        | -32.2(-65.9 to 1.4)                                | 0.160   | -2.2(-36.4 to 32.0)  | 0.862   | -49.9(-83.3 to -16.4) | 0.031   | 0.122                        |
| Serum total cholesterol, mg/dL |                                                    |         |                      |         |                       |         |                              |
| Week 4                         | -12.9(-47.4 to 21.5)                               | 0.158   | -0.7(-35.7 to 34.3)  | 0.522   | -10.4(-44.6 to 23.8)  | 0.424   | 0.634                        |
| Week 8                         | 4.6(-29.9 to 39.1)                                 | 0.731   | 46.0 (11.0 to 80.9)  | 0.184   | 2.9(-31.4 to 37.1)    | <0.0001 | 0.001                        |
| Week 12                        | 1.7(-32.8 to 36.2)                                 | 0.102   | 1.2(-33.7 to 36.2)   | 0.850   | -4.5(-38.8 to 29.7)   | 0.003   | 0.003                        |
| HDL-C, mg/dL                   |                                                    |         |                      |         |                       |         |                              |
| Week 4                         | 0.3(-3.3 to 4.0)                                   | 0.214   | 0.4(-3.3 to 4.1)     | 0.738   | -0.7(-4.3 to 2.9)     | 0.018   | 0.041                        |
| Week 8                         | 1.9(-1.7 to 5.5)                                   | 0.829   | 1.3(-2.4 to 5.0)     | 0.834   | 0.4(-3.2 to 4.0)      | 0.003   | 0.000                        |
| Week 12                        | 6.6(2.9 to 10.2)                                   | 0.020   | 3.4(-0.3 to 7.1)     | 0.197   | 3.1(-0.6 to 6.7)      | <0.0001 | <0.0001                      |
| LDL-C, mg/dL                   |                                                    |         |                      |         |                       |         |                              |
| Week 4                         | -12.3(-22.7 to -2.0)                               | 0.107   | -5.4(-15.9 to 5.1)   | 0.021   | -7.4(-17.7 to 2.9)    | 0.000   | 0.000                        |

| Outcome                            | Between-group differences from baseline to week 12 |         |                     |         |                       |         | P Value of Group differences |
|------------------------------------|----------------------------------------------------|---------|---------------------|---------|-----------------------|---------|------------------------------|
|                                    | LC diet vs NC diet                                 |         | CR diet vs NC diet  |         | LC+CR diet vs NC diet |         |                              |
|                                    | Changes (95% CIs)                                  | P Value | Changes (95% CIs)   | P Value | Changes (95% CIs)     | P Value |                              |
| Week 8                             | -8.8(-19.2 to 1.6)                                 | 0.580   | -5.0 (-15.5 to 5.5) | 0.056   | -2.9(-13.1 to 7.4)    | 0.090   | 0.318                        |
| Week 12                            | -2.7(-13.0 to 7.7)                                 | 0.356   | -3.2(-13.7 to 7.3)  | 0.140   | -4.9(-15.2 to 5.4)    | 0.862   | 0.540                        |
| ALT, IU/L                          |                                                    |         |                     |         |                       | 0.719   | 0.154                        |
| Week 4                             | -7.4(-13.2 to -1.6)                                | 0.168   | -1.8(-7.7 to 4.1)   | 0.856   | -2.2(-7.9 to 3.6)     |         |                              |
| Week 8                             | -7.7(-13.5 to -1.9)                                | 0.145   | -3.1(-9.0 to 2.8)   | 0.465   | -6.1(-11.9 to -0.3)   | 0.701   | 0.388                        |
| Week 12                            | -9.4(-15.2 to -3.6)                                | 0.077   | -2.9(-8.8 to 3.0)   | 0.593   | -6.5(-12.3 to -0.7)   | 0.307   | 0.609                        |
| AST, IU/L                          |                                                    |         |                     |         |                       | 0.019   | 0.062                        |
| Week 4                             | -3.6(-6.8 to -0.4)                                 | 0.354   | -2.4(-5.7 to 0.8)   | 0.654   | -1.5(-4.6 to 1.7)     |         |                              |
| Week 8                             | -2.1(-5.3 to 1.1)                                  | 0.877   | -1.1(-4.4 to 2.1)   | 0.642   | -1.7(-4.9 to 1.4)     | 0.243   | 0.132                        |
| Week 12                            | -5.6(-8.8 to -2.5)                                 | 0.044   | -2.7(-6.0 to 0.5)   | 0.574   | -3.8(-6.9 to -0.6)    | 0.935   | 0.156                        |
| Uric acid, mg/dl                   |                                                    |         |                     |         |                       | 0.683   | 0.109                        |
| Week 4                             | -0.6(-1.2 to 0.0)                                  | 0.167   | -0.2(-0.8 to 0.4)   | 0.323   | -0.2(-0.8 to 0.3)     |         |                              |
| Week 8                             | -1.3(-1.8 to -0.7)                                 | <0.0001 | -0.5(-1.1 to 0.1)   | 0.013   | -0.6(-1.2 to -0.1)    | 0.407   | 0.492                        |
| Week 12                            | -1.2(-1.8 to -0.6)                                 | <0.0001 | -0.6(-1.2 to -0.1)  | 0.003   | -0.9(-1.4 to -0.3)    | 0.011   | 0.068                        |
| Visceral Fat Area, cm <sup>2</sup> |                                                    |         |                     |         |                       | 0.593   | 0.098                        |
| Week 4                             | -5.3(-8.7 to -1.8)                                 | 0.003   | -2.5(-6.0 to 1.1)   | 0.168   | -8.6(-12.1 to -5.2)   |         |                              |
| Week 8                             | -11.8(-15.4 to -8.2)                               | <0.0001 | -5.5(-9.2 to -1.8)  | 0.004   | -17.1(-20.7 to -13.5) | 0.799   | 0.638                        |
| Week 12                            | -12.9(-17.2 to -8.7)                               | <0.0001 | -5.2(-9.6 to -0.8)  | 0.020   | -20.6(-24.8 to -16.3) | 0.965   | 0.966                        |
| Body muscle rate, %                |                                                    |         |                     |         |                       | 0.236   | 0.211                        |
| Week 4                             | -0.4(-2.2 to 1.4)                                  | 0.350   | -0.5(-2.3 to 1.4)   | 0.289   | 0.0 (-1.8 to 1.8)     |         |                              |
| Week 8                             | 1.1(-0.7 to 2.9)                                   | 0.002   | 0.2(-1.6 to 2.1)    | 0.032   | 1.0 (-0.8 to 2.8)     | 0.294   | 0.551                        |
| Week 12                            | 1.6(-0.2 to 3.4)                                   | <0.0001 | 0.0 (-1.8 to 1.9)   | 0.000   | 1.9(0.1 to 3.6)       | 0.006   | 0.000                        |

**Table S8. Tests of between subject-effect**

| <b>Source</b>                      | <b>P Value (Corrected Model)</b> | <b>P Value (Low-Carbohydrate Diet* Low-Calorie Diet)</b> |
|------------------------------------|----------------------------------|----------------------------------------------------------|
| BMI, kg/m <sup>2</sup>             | <0.001                           | <0.001                                                   |
| Weight, kg                         | 0.008                            | <0.001                                                   |
| Waist circumference, cm            | <0.001                           | <0.001                                                   |
| WHR ratio                          | 0.015                            | <0.001                                                   |
| Body fat, %                        | <0.001                           | <0.001                                                   |
| Visceral Fat Area, cm <sup>2</sup> | 0.001                            | <0.001                                                   |
| Body muscle rate,%                 | 0.002                            | <0.001                                                   |
| Plasma glucose, mg/dL              | 0.147                            | 0.634                                                    |
| HOMA-IR                            | <0.001                           | 0.041                                                    |
| Serum triglycerides, mg/dL         | <0.001                           | <0.001                                                   |
| Serum total cholesterol, mg/dL     | 0.573                            | 0.154                                                    |
| HDL-C, mg/dL                       | 0.078                            | 0.062                                                    |
| LDL-C, mg/dL                       | 0.457                            | 0.109                                                    |
| ALT, IU/L                          | <0.001                           | 0.098                                                    |
| AST, IU/L                          | 0.011                            | 0.211                                                    |
| Uric acid, mg/dl                   | <0.001                           | <0.001                                                   |
